## **Pre-post synaptic alignment through neuroligin tunes synaptic transmission efficiency**

Kalina T. Haas<sup>1,2,3\*</sup>, Benjamin Compans<sup>1,2\*</sup>, Mathieu Letellier<sup>1,2\*</sup>, Thomas M Bartol Jr<sup>4</sup>, Dolores Grillo-Bosch<sup>1,2</sup>, Terrence J Sejnowski<sup>4</sup>, Matthieu Sainlos<sup>1,2</sup>, Daniel Choquet<sup>1,2,5</sup>, Olivier Thoumine<sup>1,2</sup> and Eric Hosy<sup>1,2,\$</sup>

<sup>1</sup> Univ. Bordeaux, Interdisciplinary Institute for Neuroscience, UMR 5297, F-33000 Bordeaux, France

<sup>2</sup> CNRS, Interdisciplinary Institute for Neuroscience, UMR 5297, F-33000 Bordeaux, France

<sup>3</sup> Present address: Medical Research Council Cancer Unit, University of Cambridge, Hutchison/MRC Research Centre, Box 197 Biomedical Campus, CB20XZ, Cambridge, United Kingdom

<sup>4</sup> Howard Hughes Medical Institute, Salk Institute for Biological Studies, La Jolla, United States

<sup>5</sup> Bordeaux Imaging Center, UMS 3420 CNRS, Université de Bordeaux, US4 INSERM, F-33000 Bordeaux, France

<sup>\$</sup> corresponding author

\* Contributed equally to the work

### **Summary**

**The nanoscale organization of neurotransmitter receptors relative to pre-synaptic release sites is a fundamental determinant of both the amplitude and reliability of synaptic transmission. How modifications in the alignment between pre- and post-synaptic machineries affect synaptic current properties has only been addressed with computer modeling, and therefore remains hypothetical. Using dual-color single molecule based super-resolution microscopy, we found a strong spatial correlation between AMPA receptor (AMPA) nanodomains and the post-synaptic adhesion protein neuroligin-1 (NLG1). Expression of a C-terminal truncated form of NLG1 disrupted this correlation without affecting the intrinsic organization of AMPAR nanodomains. Moreover, this NLG1 dominant-negative mutant significantly shifted the pre-synaptic release machinery from AMPAR synaptic clusters. Electrophysiology and computer modeling show that this physical shift is sufficient to induce a significant decrease in synaptic transmission. Thus, our results suggest the necessity for synapses to release glutamate in front of AMPAR nanodomains, to maintain a high efficiency of synaptic responses.**

## Introduction

AMPA-type glutamate receptors (AMPA) mediate the vast majority of fast excitatory synaptic transmission in the mammalian brain. AMPARs are stabilized at the post-synaptic density (PSD) by interactions with PDZ domain containing proteins such as PSD-95. AMPARs were initially thought to be homogeneously distributed throughout the PSD, but recent work based on super-resolution optical imaging (SRI) and electron microscopy has demonstrated that AMPARs are concentrated in small nanodomains around 80 nm in size, and containing 20 receptors on average (Fukata et al., 2013; MacGillavry et al., 2013; Masugi-Tokita et al., 2007; Nair et al., 2013). This specific mode of organization might be critical for synaptic transmission, depending on the relative positioning of pre-synaptic release sites with respect to AMPAR nanodomains. Previous studies showed that the glutamate content of a single presynaptic vesicle is not sufficient to activate the entire pool of AMPARs inside the PSD (Liu et al., 1999; Raghavachari and Lisman, 2004), suggesting that synaptic currents might be stronger if AMPARs were concentrated in front of pre-synaptic release sites rather than dispersed throughout the PSD. Moreover, mathematical models predict that when AMPARs are clustered in front of glutamate release sites, both the amplitude and the reliability of synaptic responses are improved (Franks et al., 2002; Franks et al., 2003; Tarusawa et al., 2009). In contrast, when AMPAR clusters are not aligned with release sites, synaptic currents are predicted to be weaker and highly variable (Tarusawa et al., 2009). Therefore, it is critical to understand the spatial relationship between glutamate release sites and AMPAR domains at the nanoscale level.

Dual-color SRI offers a new way to analyze the alignment of pre- and post-synaptic elements underlying the intrinsic function of the synapse. Several studies have examined the nanoscale organization of various pre-synaptic proteins, including calcium channels, syntaxin, and neuroligin (Chamma et al., 2016; Ribault et al., 2011; Schneider et al., 2015), but these proteins did not display a clustered organization resembling that of AMPARs (Hosy et al., 2014; Nair et al., 2013). A recent study indicated that the pre-synaptic active zone protein RIM is concentrated in small domains (Tang et al., 2016). Furthermore, this study indicated that active glutamate release sites are co-localized with RIM and aligned with AMPAR nanodomains. This trans-synaptic “nanocolumn” organization is regulated by long-term synaptic plasticity, highlighting its importance for the control of synaptic transmission. However, the molecular mechanisms underlying this alignment are still unknown, and the sensitivity of synaptic currents to mis-alignment has not been experimentally investigated.

One way to test the importance of pre- to post-synaptic alignment would be to destabilize the trans-synaptic organization and study its effect on synaptic transmission. It has been abundantly described that the adhesion complex neuroligin-neurexin forms a trans-synaptic bridge (Sudhof, 2008). Pre-synaptic neuroligin is implicated in active zone formation (Missler et al., 2003), while post-synaptic neuroligin recruits PSD-95, NMDA receptors and AMPARs to partly structure the PSD (Budreck et al., 2013; Graf et al., 2004; Heine et al., 2008; Mondin et al., 2011). In particular, a C-terminally truncated neuroligin-1 (NLG1) mutant, unable to bind PDZ domain containing PSD proteins (NLG1- $\Delta$ Cter), was previously shown to prevent PSD-95 recruitment at newly formed synapses, and reduce AMPAR-mediated synaptic transmission (Chih et al., 2005; Mondin et al., 2011; Nam and Chen, 2005; Shipman et al., 2011). Here, using dual-color SRI, we report that the

expression of the NLG1- $\Delta$ Cter mutant suppresses the co-localization of NLG1 and AMPAR nanodomains without changing the overall AMPAR nanoscale organization. In parallel, we observed that NLG1- $\Delta$ Cter induced a shift between pre-synaptic RIM clusters and post-synaptic AMPAR nanodomains, associated with a significant decrease in synaptic currents. We suggest that the neurexin-neuroigin mediated pre-post synaptic alignment tightly regulates synaptic efficacy.

## Results

### Expression of NLG1- $\Delta$ Cter does not affect AMPAR nanoscale organization

To understand the role of NLG1 adhesion in AMPAR nano-organization, we performed direct STochastic Optical Reconstruction Microscopy (d-STORM) experiments on primary hippocampal neurons expressing either full length NLG1 (NLG1), or a NLG1 mutant with a truncation in the last 72 amino acid of the C-terminal domain (NLG1- $\Delta$ Cter), both constructs carrying an N-terminal HA tag. The NLG1- $\Delta$ Cter mutant has an intact extracellular domain allowing normal contacts with pre-synaptic partners such as neurexins (Chih et al., 2005; Mondin et al., 2011), but is unable to interact with cytoplasmic proteins within the PSD, and thus should behave as a dominant-negative mutant that uncouples trans-synaptic adhesion from the PSD. Given that AMPAR nanodomains are tightly associated with PSD-95 sites (MacGillavry et al., 2013; Nair et al., 2013), our rationale was that by disconnecting NLG1 from PSD-95, we would perturb the nanoscale positioning of AMPARs (n=13 cells per condition).

As previously described (Mondin et al., 2011; Nam and Chen, 2005), expression of both truncated and full length NLG1 (**Figure 1A and B**) increases spine density, revealing the synaptogenic role of neuroigin (n= 10; 12; 9 respectively; ANOVA p=0.0004). We then examined the effect of NLG1- $\Delta$ Cter expression on AMPAR nano-organization. Surface AMPARs were detected by labeling live neurons with a primary antibody specific for the N-terminal domain of the AMPAR GluA2 subunit, followed by fixation and incubation with a secondary antibody conjugated to the Alexa 647 dye. Nanodomains are determined as clusters of AMPARs present inside the synapse and containing at least 5 receptors, based on single particle emission properties (see Nair et al, 2013). In control neurons expressing GFP alone, we detected typically between 1 to 2 AMPAR nanodomains per synapse, with an average size of  $90 \pm 3$  nm (**Figure 1D and E**), as reported previously (Nair et al., 2013). NLG1 overexpression increased the surface density of AMPAR nanodomains (**Figure 1C**), in agreement with the previous finding that NLG1 potentiates the formation of excitatory synapses (Chih et al., 2005; Ko et al., 2009; Levinson et al., 2005; Mondin et al., 2011). Furthermore, NLG1 overexpression led to a re-organization of AMPAR nanodomains by increasing both their size and AMPAR content (**Figure 1D and E**). Surprisingly, expression of NLG1- $\Delta$ Cter for 3 days did not affect AMPAR nano-organization compared to the GFP control (**Figure 1C to E**, Anova post-test: p=0.72; 0.82 and 0.33 for figure C; D and E respectively). To validate this observation, we analyzed d-STORM images of AMPARs acquired on neurons expressing either GFP alone or GFP + NLG1- $\Delta$ Cter, using a cluster quantification method based on Tessellation (Levet et al., 2015) (**Figure S1A**). Through this analysis, we obtained an estimate of the number of endogenous GluA2-containing AMPARs per spine (**Figure S1B**), per nanodomain (**Figure S1C**) and the size of the nanodomains (**Figure S1D**). This analysis

confirmed that NLG1- $\Delta$ Cter expression does not affect the total amount of AMPARs per synapse, nor their organization in nanodomains.

Next, we measured the lateral mobility of endogenous GluA2-containing AMPARs at the dendritic surface in live neurons using the universal Point Accumulation in Nanoscale Topography (u-PAINT) technique (Giannone et al., 2010; Nair et al., 2013) (**Figure S2**). The receptor lateral mobility is dependent on AMPAR complex composition, phosphorylation status and desensitization properties (Compans et al., 2016; Constals et al., 2015; Hafner et al., 2015; Tomita et al., 2007). Both the distribution of diffusion coefficients and the mobile fraction (i.e. proportion of AMPARs with diffusion coefficients above  $0.01 \mu\text{m}^2/\text{s}$ ) were not significantly affected by NLG1- $\Delta$ Cter, as compared to GFP-expressing neurons (**Figure S2**,  $n=16$  Ctrl and 21 NLG1- $\Delta$ Cter, 2 sample t-test  $p=0.36$ ), in agreement with previous findings using Quantum dots (Mondin et al., 2011).

### Full-length NLG1 tightly co-localizes with AMPAR nanodomains

To examine the co-organization of AMPARs and NLG1 at the nanoscale level, we performed dual-color SRI experiments. Endogenous GluA2 were live-labelled with a primary mouse monoclonal antibody while NLG1 or NLG1- $\Delta$ Cter were live-labelled with a primary monoclonal rat anti-HA antibody. Neurons were then fixed, incubated with a secondary anti-mouse antibody conjugated to Alexa 532 and an anti-rat antibody coupled to Alexa 647, and processed for d-STORM (**Figure 2A**). Both AMPARs and NLG1 were detected as small synaptic and extra-synaptic clusters (**Figure 2B**). Qualitatively, we observed that the majority of synaptic NLG1 spots (green) overlapped with AMPAR nanodomains (purple). To precisely quantify the degree of co-localization between AMPAR and NLG1 clusters, we developed a method based on Manders' coefficients and bivariate nearest neighbor distance (see Methods). Manders' coefficients have been widely used in diffraction-limited microscopy to quantify the co-localization between pairs of objects characterized by different fluorescent markers (Manders, 1993).

We first validated both the labeling efficiency and the co-localization by studying co-organization between HA-GluA1 (labelled with the same primary monoclonal rat anti-HA antibody, revealed with Alexa 647) and endogenous GluA2 (labelled with primary mouse monoclonal anti-GluA2 antibody, revealed with Alexa 532; **Figure S3**). These experiments have the advantage of using the same combination of antibodies as in **Fig. 2**. Since AMPARs form heterotetramers in neurons, the labelings for GluA1 and GluA2 are expected to exhibit a high level of co-localization (**Figure S3**). The comparison between the size of single fluorescence emitters and both Alexa 532 and Alexa 647 labelled objects clearly demonstrates the presence of GluA1 and GluA2 clusters (**Figure S3B**). The distribution of bivariate nearest neighbor distances shows that 80% of HA-labelled GluA1 clusters have a GluA2 label within 80 nm (**Figure S3C**). The comparison of the experimental distribution of bivariate nearest neighbor distances to an *in silico* distribution obtained by randomization of cluster localization, clearly demonstrates that GluA1-HA and GluA2 clusters display a high degree of co-localization (**Figure S3C**). Finally, the Manders' representation in (**Figure S3D**) reveals two points: first, only 5% of GluA1 and GluA2 object pairs have a null Manders' coefficient, reflecting that almost all Alexa 532-GluA2 labelled objects co-localize at least partly with Alexa 647-GluA1 labelled objects. Second, even though we co-labelled proteins belonging to the same cluster, less than 20% of objects exhibit a Manders' coefficient higher than

0.8, but 60 % overlapped on an area larger than 50 %. This likely originates from the fact that high levels of co-localization are difficult to reach in 2-color super-resolved images due to achromatism and the antibody size.

We then applied the Manders' analysis to examine the co-localization between AMPAR nanodomains and NLG1 clusters inside synapses (**Figure 2C, D and E; green line**). The similar area distribution between single fluorescence emitters and NLG1 clusters (**Figure 2C**) reveals that NLG1 does not form large domains inside synapses, but rather several small clusters, confirming previous findings with an alternative labeling strategy (Chamma et al., 2016). In contrast, the area distribution of AMPARs displays larger values, due to AMPAR clustering. For the remaining part of the analysis, we took into account all NLG1 objects, but only selected AMPAR objects larger than  $0.005 \mu\text{m}^2$  (**red dashed line Figure S3B**), a threshold allowing the suppression of 80% of single emitters. The centroid to centroid bivariate nearest neighbor distance distribution between NLG1 and AMPAR nanodomains was significantly smaller than that expected from an independent distribution (**Figure 2D; green line**,  $n=512$  pairs of co-localization), indicating a functional proximity between NLG1 and GluA2 clusters at the nanoscale. The difference between the two curves was already apparent in the first 100 nm, revealing a tight association between NLG1 and AMPAR nanodomains at a short length scale. Finally, Manders' coefficients were calculated between each pair of objects (**Figure 2E; green line**,  $n=512$  pairs of co-localization). Only 20% of NLG1 clusters did not co-localize even partially with a GluA2 nanodomain, while almost 75% of NLG1 clusters co-localized to more than 80% with AMPAR nanodomains. These results demonstrate the tight nanoscale co-organization between AMPAR and NLG1 within a synapse.

### **NLG1- $\Delta$ C is delocalized from AMPAR nanodomains**

Next, we analyzed the distribution of AMPAR nanodomains with respect to NLG1- $\Delta$ Cter (**Figure 2D and E; 316 pairs of co-localization**). As NLG1, NLG1- $\Delta$ Cter was organized in small clusters (**Figure 2C, red line**) with an average size of  $0.005 \mu\text{m}^2$ , whereas AMPARs were distributed as both small and large objects. The bivariate nearest neighbor distances between NLG1- $\Delta$ Cter and AMPAR clusters were significantly larger than for NLG1 and AMPAR nanodomains. Centroid to centroid bivariate nearest neighbor distance between all NLG1- $\Delta$ Cter object and GluA2 clusters overlapped with a random distribution, at least for the first 250 nm corresponding to the PSD size (**Figure 2F, red line**). This led us to the conclusion that there is no preferential association of NLG1- $\Delta$ Cter clusters with AMPAR nanodomains. This was confirmed by looking at the distribution of Manders' coefficients (**Figure 2G, red line**). Only 38% of NLG1- $\Delta$ Cter co-localized at least partially with AMPARs, compared with 80% for NLG1, revealing that the NLG1 C-terminal truncation strongly decreases the association between NLG1 and AMPAR nanodomains (comparison with NLG1: 2 sample t-test  $p < 0.0001$ ).

### **NLG1 $\Delta$ C expression shifts the alignment between presynaptic RIM and post-synaptic AMPAR nanodomains**

We then analyzed the effect of NLG1- $\Delta$ Cter expression on the alignment between pre-synaptic RIM and post-synaptic AMPAR clusters. These two proteins are components of the trans-synaptic "nanocolumns", which organize pre-synaptic release sites in front of post-synaptic AMPAR

clusters (Tang et al., 2016). Both RIM and AMPAR were endogenously labelled, while post-synaptic neurons expressed GFP, NLG1 or NLG1- $\Delta$ Cter (**Figure 3A, B and C**). The bivariate nearest neighbor distances between RIM and AMPAR clusters was not affected by NLG1 expression, but was significantly larger when NLG1- $\Delta$ Cter was expressed (**Figure 3B, Anova  $p < 0.001$** ). The distribution of Manders' coefficients confirmed that NLG1- $\Delta$ Cter expression decreased the RIM-AMPA apposition (**Figure 3C, Anova  $p < 0.001$** ). These results demonstrate a physical misalignment between the presynaptic marker RIM and the postsynaptic AMPAR clusters upon NLG1- $\Delta$ Cter expression, while NLG1 expression didn't display similar effect.

### **NLG1 C-terminus truncation impairs synaptic transmission**

To estimate the effect of a decorrelation between AMPAR nanoclusters and pre-synaptic release sites on synaptic transmission, we first recorded miniature AMPAR currents on dissociated hippocampal cultures by electrophysiology, upon expression of NLG1- $\Delta$ Cter + GFP, GFP alone as a control, or full length NLG1 + GFP (**Figure 4A to C**). Chronic NLG1- $\Delta$ Cter expression (3 days) reduced the amplitude of AMPAR mEPSCs by 24% as compared to GFP expressing control (**Figures 4C, Anova  $p = 0.0002$** ). In contrast, NLG1 expression did not affect the miniature amplitude, even if as expected by the high increase in synapse number observed in **Figure 1A**, we observed a significant increase in miniature frequency (**Figure S4A**). These results show that synaptic elementary transmission is not altered by NLG1 overexpression but when the linkage between NLG1-based adhesion and AMPAR clusters is perturbed.

To confirm these conclusions in a model system having preserved synaptic connectivity, we used mouse organotypic hippocampal cultures, in which single CA1 neurons were electroporated with GFP-tagged either NLG1 or NLG1- $\Delta$ Cter. One week later, evoked whole-cell currents were recorded from electroporated neurons and from neighboring non-electroporated counterparts, upon stimulation of Schaffer collaterals (**Figure 4D to I**). Calcium was replaced by strontium in the extracellular solution to induce the asynchronous release of pre-synaptic vesicles following stimulation, thereby evoking a train of miniature AMPA currents post-synaptically (Goda and Stevens, 1994). Both NLG1 and NLG1- $\Delta$ Cter expression increased the number of evoked miniature currents compared to non-electroporated neurons, again likely reflecting the synaptogenic effect of NLG1 (**Figure S4B**). As observed in cell cultures, the current amplitude was reduced by 26% in neurons expressing NLG1- $\Delta$ Cter but not in neurons expressing NLG1, when compared to control non-electroporated neurons (**Figure 4H and I, paired t-test  $p = 0.99$  and  $0.018$** ). Similar results were obtained on the NLG1 KO background (**Figure S5**), with a 32 % decrease of aEPSC amplitude on NLG1- $\Delta$ Cter expressing neurons relatively to unelectroporated counterparts. The similarity of the current decrease, both in the WT or NLG1 KO background, emphasizes the dominant negative role of the NLG1- $\Delta$ Cter expression (see discussion). Finally, in order to investigate whether expression of NLG1 or NLG1- $\Delta$ Cter could affect presynaptic function, we measured the paired-pulse ratio (PPR) in an extracellular solution containing calcium. There was no significant change in PPR upon expression of either NLG1 or NLG1- $\Delta$ Cter (**Figure S6**), indicating no specific modification of the pre-synaptic release probability.

### **Cell permeant neuroligin biomimetic divalent ligand disrupt pre-post alignment and decrease AMPAR-mediated synaptic transmission**

To confirm the role of NLG1 C-terminal interactions in aligning AMPARs in front of pre-synaptic release sites, without overexpressing NLG1- $\Delta$ Cter mutants which might also affect pre-synaptic development, we used an alternative strategy. Based on our previous expertise to perturb interactions between stargazin and PSD-95 (Sainlos et al.), we developed divalent biomimetic ligands comprising the 15 C-terminal amino acids of NLG1, conjugated to a TAT sequence to favor cell penetration. In contrast to the NLG1- $\Delta$ Cter mutant, those ligands directly compete with endogenous neuroligins to bind PDZ domain containing scaffolding proteins at the post-synapse, without altering the binding of neuroligins to pre-synaptic proteins such as neuexins. Control non-sense ligands had the same structure but mutations in the sequence prevent interaction with PDZ-domain. Incubation of 14 DIV hippocampal neurons for 1-2 days with NLG1 competing ligands caused a misalignment between RIM and GluA2 containing AMPARs observed by dual-color STORM (**Figure 5A-C**), and a 30% decrease in AMPAR-mediated mEPSC amplitudes (**Figure 5E**). In both assays, non-sense peptides had no effect compared to untreated neurons, demonstrating the absence of effect of TAT peptide treatment. Interestingly, NLG1 peptides did not alter AMPAR-mediated mEPSC frequency (**Figure 5F**), suggesting an exclusive post-synaptic effect. Overall, NLG1 competing peptides and NLG1- $\Delta$ Cter expression had very similar effects on AMPAR positioning and synaptic responses, suggesting a common mechanism of action.

### **Synaptic efficiency critically depends on the AMPAR nanodomains to glutamate release sites distance**

To examine theoretically the effects of delocalizing AMPAR nanodomains from pre-synaptic glutamate release sites, we performed Monte-Carlo based simulation using the MCell software (**Figure 6**). The synaptic shape and perisynaptic environment was obtained from 3D electron microscopy images reconstructing the neuropil of a hippocampal CA1 stratum radiatum area, previously developed to model synaptic transmission (Bartol et al., 2015a; Bartol et al., 2015b; Kinney et al., 2013) (See Methods). AMPAR chemical kinetic properties were obtained from a well-established model (Jonas et al., 1993) (**Figure 6B**) and the kinetic parameters were adjusted to fit both the recorded mEPSCs, and the AMPAR organization map extracted from the d-STORM data (**Figure 1** and (Nair et al., 2013) see Methods). In the simulations, the number of released glutamate molecules was fixed to 1500, 2000, 3000 or 4500, to be in the range of the estimated amount per pre-synaptic vesicle (Savtchenko et al., 2013). Simulations computed the number of open AMPARs, when vesicles containing the various glutamate quantities were released in front of a single AMPAR cluster, or up to 200 nm away from the cluster center, varied with a 50 nm increment (**Figure 6B**). As expected, simulated curves demonstrated that the glutamate content per pre-synaptic vesicle was positively correlated to the synaptic response (**Figure 6C**). Strikingly, the simulation further showed that the current amplitude was inversely correlated to the distance between the release site and AMPAR nanodomains (**Figure 6D**). A release of 3000 glutamate molecules, which is in the upper range of glutamate content per vesicle, at 150 nm from an AMPAR nanodomain, lead to a decrease of almost 40% of the synaptic response. In this model, the release distance is measured from the center of the nanodomain, which has a 90 nm diameter size. Even at 50 nm from the centroid (i.e., at the close periphery of the nanodomain), a significant decrease of current amplitude was already observed for low glutamate content (**Figure 6D**). The expected decrease in synaptic current amplitude was also sensitive to the glutamate content (**Figure 6E**). Specifically, the 26% decrease of AMPAR current observed experimentally corresponds to a

glutamate content of around 2000 molecules when the release site is localized 90 nm away from the nanodomain centroid (**Figure 6E**).

## Discussion

Our study advocates two main conclusions. First, NLG1 is one of the main organizers of trans-synaptic “nano-columns”, positioning AMPAR nanodomains in close proximity to pre-synaptic release sites. Second, the amplitude of AMPAR-mediated currents is highly sensitive to pre-post synaptic nanoscale alignment (**Figure 6F**). At the synapse, NLG1 executes two distinct functions. One is to regulate synapse number, the other is to organize the post-synaptic compartment (Ko et al., 2009; Levinson et al., 2005; Sara et al., 2005; Scheiffele et al., 2000). NLG1 binds pre-synaptic neurexins via its extracellular domain, while its cytoplasmic tail exhibits various binding sites including a C-terminal PDZ domain binding motif, a central gephyrin binding motif, and an upstream non-canonical motif without identified interactor but also important for neuroligin function (Dean et al., 2003; Giannone et al., 2013; Irie et al., 1997; Shipman et al., 2011). Here, we used a NLG1 construct lacking both the PSD-95 and gephyrin binding domains. When expressed during the normal period of synaptogenesis, this NLG1 mutant is able to strongly increase synapse number, but does not recruit enough PSD-95 and AMPARs to sustain normal synaptic transmission (Budreck et al., 2013; Mondin et al., 2011; Nam and Chen, 2005).

We found that expressing NLG1- $\Delta$ Cter later in development (synapse maturation stage) caused a modest increase in spine density, accompanied by a decrease in quantal transmission. Interestingly, the AMPAR content per synapse was not affected, nor their organization in nanodomains. Rather, the NLG1- $\Delta$ Cter displaced their spatial alignment with pre-synaptic release sites visualized by RIM clusters. Our interpretation is that NLG1- $\Delta$ Cter outcompeted with endogenous NLG1 for the binding to neurexins (or other pre-synaptic partners), allowing unanchored PSD-95 scaffolds and AMPAR nanodomains to flow away from the release site (MacGillavry et al., 2013; Nair et al., 2013). As previously published, heterodimerization might occur between recombinant NLG1- $\Delta$ Cter and endogenous NLG1 (Shipman et al., 2011), but on average we observed a clear shift between NLG1- $\Delta$ Cter labeling and AMPAR nanodomains, suggesting a dominant negative effect. Interestingly, a similar reduction in AMPAR currents induced by NLG1- $\Delta$ Cter was observed in organotypic slices from both NLG1 WT and KO genetic backgrounds, revealing a potential heterodimerization of NLG1- $\Delta$ Cter with other NLGs, specifically NLG3 (Shipman et al., 2011). Acute application of cell-permeant NLG1 ligand confirmed these conclusions. The obtained results demonstrate that C-terminal interactions between NLG1 and PDZ domain containing scaffold proteins such as PSD-95, are important to align AMPAR nanodomains in front of pre-synaptic release sites.

The functional effect of such a molecular disorganization caused either by NLG1- $\Delta$ Cter expression or NLG1 peptide incubation was found to be unexpectedly important, i.e. less than 100 nm displacement triggers decreases mEPSC amplitude by about 30%. Modeling confirmed the high sensitivity of the AMPAR synaptic currents to the position of the pre-synaptic release with respect to AMPAR nanodomains. Considering that quantal synaptic transmission results from the release of glutamate from one vesicle in front of an AMPAR nanodomain, three obvious parameters determine the number of activated AMPARs: 1/ the amount of glutamate per vesicle; 2/ the number



of AMPARs per nanodomain; and 3/ the degree of apposition between release sites and nanodomains. Our simulations predict that an equivalent 25% decrease of current could be explained by either a 3-fold decrease in glutamate content (from 4500 to 1500 molecules per vesicle), a 32% loss in the number of AMPARs per nanodomain, or a 100 nm shift between pre- and post-organization (for a glutamate content of 2000 molecules per vesicle).

Our observations support a new model of synaptic function, where the quantum of synaptic transmission is more sensitive to AMPAR nanoscale organization and alignment with respect to release sites, than to the glutamate content per vesicle and even AMPAR content per nanodomain. These specific properties are due in part to the relatively low affinity of AMPAR for glutamate (mM range) and the fact that released glutamate rapidly fades away laterally as it crosses the synaptic cleft (Lisman et al., 2007; Liu et al., 1999; Tarusawa et al., 2009). These results suggest two changes in our conception of the efficacy of synaptic function. First, synapses exhibit a relative tolerance to variability both in the glutamate content per vesicle and in the number of AMPAR per nanodomains. Indeed, 10 to 20% variation in these parameters will not drastically affect synaptic transmission efficacy. We show that the combination of pre-post alignment and nanodomain organization is sufficient to bring some stability to synaptic transmission. Second, fast and large modifications in synaptic amplitude can be better achieved by molecular pre-post misalignment than by changes in AMPAR number. This prediction is in line with the transient physiological misalignment previously described upon induction of chemical Long Term Depression (LTD) (Tang et al., 2016).

In conclusion, this study suggests that synapses, via trans-synaptic adhesion, optimize the use of glutamate, by controlling an alignment between pre-synaptic release sites and AMPAR nanodomains. Previous modeling experiments suggested that high efficiency of synaptic transmission, high amplitude response and low variability, requires a tight clustering of AMPA receptors, and an alignment of these clusters with the pre-synaptic release site (Nair et al., 2013; Tarusawa et al., 2009). Based on super-resolution imaging techniques and the use of the NLG1 C-terminal truncation mutant, our study reveals the surprisingly high sensitivity of the system to this trans-synaptic molecular organization.

## **Material and methods**

### **Cell and brain slice culture and transfection**

Preparation of cultured neurons was performed as previously described (Nair et al., 2013). Hippocampal neurons from 18-day-old rat embryos of either sex were cultured on glass coverslips following the Banker protocol. Neurons were transfected using Effectene (Qiagen) at 10-11 days in vitro (DIV) with either HA::SEP::GluA1, HA::NLG1 $\Delta$ C, where the last 72 amino acid are truncated, HA::NLG1 WT or GFP alone and the cells were used for immunocytochemistry at 13-15 DIV. All experiments are done on at least 3 independent dissections.

Organotypic hippocampal slice cultures were prepared from wild type mice (C57Bl6/J strain). Briefly, hippocampi were dissected out from animals at postnatal day 5-7 and slices (350  $\mu$ m) were cut using a tissue chopper (McIlwain) and incubated with serum-containing medium on Millicell culture inserts (CM, Millipore). The medium was replaced every 2-3 days. After 3-4 days in culture, CA1 pyramidal cells were processed for single-cell electroporation with plasmids encoding

enhanced GFP (EGFP) along with wild type or  $\Delta$ Cter AP-NLG1 (Chamma et al., 2016). The pipette containing  $33 \text{ ng} \cdot \mu\text{l}^{-1}$  total DNA was placed close to the soma of individual CA1 pyramidal neurons. Electroporation was performed by applying three square pulses of negative voltage (10 V, 20 ms duration) at 1 Hz, and then the pipette was gently removed. Three to five neurons were electroporated per slice, and the slice was placed back in the incubator for 7 days before experiments.

### **Immunocytochemistry**

For the GluA2, HA-tagged proteins and RIM, primary neuronal cultures were co-incubated with monoclonal mouse anti-GluA2 antibody (Nair et al., 2013), monoclonal rat anti-HA antibody (Roche, France), RIM 1/2 antibody (synaptic systems, Gottingen, Germany) or for 5-7 minutes at  $37^\circ \text{C}$  and then fixed with 4% PFA. A preliminary permeabilization step with triton is used for the RIM labelling.

Then cells were washed 3 times for 5 min in 1x PBS. PFA was quenched with  $\text{NH}_4\text{Cl}$  50 mM for 30 minutes. Unspecific staining was blocked by incubating coverslips in 1% BSA for 1h at room temperature. Primary antibodies were revealed with Alexa 532 coupled anti-mouse IgG secondary antibodies and Alexa 647 coupled anti-rat secondary antibodies (Jackson ImmunoResearch Laboratories, USA).

### **Direct Stochastic Optical Reconstruction Microscopy (d-STORM)**

d-STORM imaging was performed on a commercial LEICA SR GSD, model DMI6000B TIRF (Leica, Germany). LEICA SR GSD was equipped with anti-vibrational table used to minimize drift, Leica HCX PL APO 160x 1.43 NA oil immersion TIRF objective and laser diodes with following wavelength: 405 nm, 488 nm, 532 nm, 642 nm (Coherent, USA). Fluorescence signal was detected with sensitive iXon3 EMCCD camera (Andor, UK). Image acquisition and control of microscope was driven by Leica software. Images were streamed at 94 fps (frames per second); image stack contained typically 30,000 frames. Selected ROI (region of interest) had dimension of  $200 \times 200$  pixels (one pixel = 100 nm). Pixel size of reconstructed super-resolved image was set to 20 nm.

Power of a 405 nm laser controlled the level of single molecules per frame. The dyes were sequentially imaged (Alexa 647 first, followed by Alexa 532) to collect the desired single molecule frames and to avoid photo bleaching. Multi-color fluorescent microspheres (Tetraspeck, Invitrogen) were used as fiducial markers to register long-term acquisitions and correct for lateral drifts and chromatic shifts. A spatial resolution of 14 nm was measured using centroid determination on 100 nm Tetraspeck beads acquired with similar signal to noise ratio than d-STORM single molecule images. Details of experimental procedure and data analysis was followed as described before (Nair et al., 2013).

Tessellation analysis of d-STORM experiments are done as described in the original paper (Levet et al., 2015).

### **uPAINT**

13-14 Days in Vitro (DIV) dissociated neurons were imaged at  $37^\circ\text{C}$  in an open Ludin Chamber (Ludin Chamber, Life Imaging Services, Switzerland) filled with 1 ml of Tyrode's. Dendritic ROIs were selected based on fluorescence from GFP. ATTO-647 coupled to antibody against AMPAR

subunit GluA2 was added to the chamber after appropriate cell was identified and region selected. Adding a suitable amount of probes controlled density of labelling. The fluorescence signal was collected using a sensitive EMCCD (Evolve, Photometric, USA). Acquisition was driven with MetaMorph software (Molecular Devices, USA) and acquisition time was set to 20 ms. Around 20 000 frames were acquired in typical experiment, collecting up to few thousands of trajectories. Sample was illuminated in oblique illumination mode. Angle of refracted beam varied smoothly and was adjust manually to maximize signal to noise ratio. The main parameters determined from the experiments was the diffusion coefficient (D) based on the fit of the mean square displacement curve (MSD). Multi-colour fluorescence microspheres were used for image registration and drift compensation. uPAINT data analysis was reported before (Giannone et al., 2010; Nair et al., 2013).

### **Electrophysiology recordings on cell culture**

Coverslips of transfected neurons were placed in a Ludin Chamber on an inverted motorized microscope (Nikon Eclipse Ti). Extracellular recording solution was composed of the following (in mM): 110 NaCl, 5.4 KCl, 1.8 CaCl<sub>2</sub>, 0.8 MgCl<sub>2</sub>, 10 HEPES, 10 D-Glucose, 0.001 Tetrodotoxin and 0.05 Picrotoxin (pH 7.4; 245 mOsm). Patch pipettes were pulled using a horizontal puller (P-97, Sutter Instrument) from borosilicate capillaries (GB150F-8P, Science Products GmbH) to resistance of 4-6 MΩ and filled with intracellular solution composed of the following (in mM): 100 K-gluconate, 10 HEPES, 1.1 EGTA, 3 ATP, 0.3 GTP, 0.1 CaCl<sub>2</sub>, 5 MgCl<sub>2</sub> (pH 7.2; 230 mOsm). Transfected neurons were identified under epifluorescence from the GFP signal. Recordings were performed using an EPC10 patch clamp amplifier operated with Patchmaster software (HEKA Elektronik). Whole-cell voltage clamp recordings were performed at room temperature and at a holding potential of -70 mV. Unless specified otherwise, all chemicals were purchased from Sigma-Aldrich except for drugs, which were from Tocris Bioscience.

Data were collected and analysis of miniature EPSCs were performed using a software developed by Andrew Penn, the matlab script is available on MATLAB File Exchange, ID: 61567; <http://uk.mathworks.com/matlabcentral/fileexchange/61567-peaker-analysis-toolbox>).

### **Electrophysiology recordings on organotypic brain slices**

Dual whole-cell patch-clamp recordings were carried out in the CA1 region from organotypic hippocampal slices placed on the stage of a Nikon Eclipse FN1 upright microscope at room temperature and using Multiclamp 700B amplifier (Axon Instruments). The recording chamber was continuously perfused with aCSF bubbled with 95% O<sub>2</sub>/ 5% CO<sub>2</sub> and containing (in mM): 125 NaCl, 2.5 KCl, 26 NaHCO<sub>3</sub>, 1.25 NaH<sub>2</sub>PO<sub>4</sub>, 2 CaCl<sub>2</sub>, 1 MgCl<sub>2</sub>, and 25 glucose. Resistance of patch-pipettes was 4-6 mΩ when filled with a solution containing (in mM) : 135 CsMeSO<sub>4</sub>, 8 CsCl, 10 HEPES, 0.3 EGTA, 4 MgATP, 0.3 NaGTP, 5 QX-314, pH 7.28, 302 mOsm. EPSCs were elicited in CA1 pyramidal neurons by stimulating Schaffer collaterals in the stratum radiatum with a bipolar stimulation electrode in borosilicate theta glass filled with aCSF. Bicuculline (20 μM) was added to the aCSF to block inhibitory currents and DNQX (100 nM) was added to control epileptic activity. Series resistance was always lower than 20 mΩ. Paired-pulse ratio was determined by delivering two stimuli 50 ms apart and dividing the peak response to the second stimulus by the peak response of the first one. For recordings aEPSCs, extracellular CaCl<sub>2</sub> was substituted to

equimolar SrCl<sub>2</sub>. aEPSCs evoked within 500 ms after the stimulation, were analyzed off-line with Mini Analysis software (Synaptosoft). In all cases, at least 20 sweeps per recording were analysed with a detection threshold set at 5 pA.

### Co-localization analysis

Co-localization analysis was performed using custom written program in Matlab (Mathworks, UK). Manders' coefficients were chosen as co-localization measure because they do not depend on the relative intensity difference between two component images, therefore bypassing alteration in labeling efficiency of different cellular structures. Here we perform pairwise analysis between coincidental objects observed in two image components. Thus, our Manders' coefficients represent fraction of the intensity belonging to co-localizing super-resolution pixels of a given object. Manders' coefficients are calculated using following equations:

$$M_1 = \frac{\sum_i^n I_{1i, coloc}}{\sum_i^n I_{1i}}$$
$$M_2 = \frac{\sum_i^n I_{2i, coloc}}{\sum_i^n I_{2i}}$$

Where  $i$  is a pixel index, 1 and 2 stands for two image components and  $n$  is the number of pixels in an object for which coefficient is evaluated.  $I_{1i} \geq 0$  ( $I_{2i} \geq 0$ ) are intensity values at the  $i^{\text{th}}$  pixel of an object in the first (second) component of the dual-color image.

In first step, two image components are threshold, segmented and reduced to sets of geometrical objects attributed with their weighted centroid location, pixel area, intensity and location. Objects in each component image were divided into two categories, according to their area. This distinction is based on the size of single emitter found both on the coverslip and on the dendrite. With this analysis, we can tell apart the single proteins from the clustered ones, and analyze them independently.

In subsequent step, first bivariate nearest neighbor distance distribution is calculated for each neuroigin to the nearest AMPAR cluster. Afterwards, the Manders' coefficients are evaluated between each first nearest neighbor pair of AMPAR cluster and neuroigin. These coefficients were calculated only between pairs of AMPAR and neuroigin separated by the threshold distance, which reflects the maximum distance between two objects considered as related and was obtained from bivariate nearest neighbor distance distribution.

Co-localization significance was accounted for by image randomization. Objects in one image component were rearranged by random assignment of new position for their weighted centroids. This step was repeated up to 1000 times, each time appropriate measure of co-localization was evaluated. Bivariate first nearest neighbour distributions are compared to the mean of randomized samples and 95 % confidence intervals. If the experimental distribution lies above (below)

randomized distribution, it indicates tendency towards association (dispersion) at given distances. However, if experimental distribution matches randomized one, it points to random or independent distribution between two classes of objects. Matlab scripts are available on request and will be deposited at <http://uk.mathworks.com/matlabcentral/fileexchange>.

### **Biomimetic ligands**

Synthesis of the divalent TAT-non-sense ligands was previously described in Sainlos et al 2011 (Sainlos et al.). The neuroligin divalent ligands was produced similarly using the last 15 amino acids of NLG1 as PDZ domain binding motifs.

### **Modeling**

Computer modeling were performed using the MCell/CellBlender simulation environment (<http://mcell.org>) with MCell version 3.3, CellBlender version 1.1, and Blender version 2.77a (<http://blender.org>). The realistic model of glutamatergic synaptic transmission (Fig 5A) was constructed from 3DEM of hippocampal area CA1 neuropil as described in (Bartol et al., 2015a; Bartol et al., 2015b; Kinney et al., 2013). The 3DEM reconstruction is highly accurate and detailed and contains all plasma membrane bounded components including dendrites, axons, astrocytic glia and the extracellular space itself, in a  $6 \times 6 \times 5 \text{ } \mu\text{m}^3$  volume of hippocampal area CA1 stratum radiatum from adult rat. As fully described in Kinney et al. (2013) special methods were developed and applied to the 3DEM to correct for shrinkage and fixation artifacts to accurately recover the dimensions and topology of the extracellular space. The model contains glutamate transporters, 10000 per square micron, on the astrocytic glia processes, as described in Bartol et al., 2015. The images in Fig 5A were generated from the 3DEM reconstruction using Blender ([blender.org](http://blender.org)) and the CellBlender addon ([mcell.org](http://mcell.org)). For the dendritic spine synapse shown in Fig 5A, the cleft height is 20 nm and the lateral size of the PSD area is  $350 \times 250 \text{ nm}$ .

The AMPAR rate constants in the model were adjusted using simplex optimization with minimum least-squares to best fit the shape of the AMPAR current (20-80% rise time, peak amplitude, 10-90% fall time of the AMPAR current) reported in Nair et al., 2013. The initial parameter values are as reported in Jonas et al, 1993 with release of glutamate directly over the cluster while holding fixed values of  $n_{\text{Glu}} = 3000$ ,  $n_{\text{AMPAR}} = 25$  in cluster. The best fit parameter values are reported in the caption for Fig 5B. We averaged the AMPAR activation time courses of 100 simulation trials at each release location and number of glutamate released.

### **Statistics**

Summary statistics are presented as mean  $\pm$  SEM (Standard Error of the Mean). Statistical significance tests were performed using GraphPad Prism software (San Diego, CA). Test for normality was performed with D'Agostino and Pearson omnibus tests. For non-normally distributed data, we applied Mann-Whitney test or Wilcoxon matched-pairs signed rank test for paired observations. When the data followed normal distribution, we used paired or unpaired t-test for paired observations unless stated otherwise. ANOVA test was used to compare means of several groups of normally distributed variables. Indications of significance correspond to p values  $< 0.05$  (\*),  $p < 0.005$  (\*\*), and  $p < 0.0005$  (\*\*\*)).

## **Ethical Approval**

All experiments were approved by the Regional Ethical Committee on Animal Experiments of Bordeaux.

## **ACKNOWLEDGEMENTS**

We acknowledge E. Gouaux for the anti-GluA2 antibody; J-B Sibarita and Corey Butler for providing single particle analysis software, M. Sainlos and I. Gauthereau for anti-GFP nanobody production; C. Breillat and E. Verdier for cell culture and plasmid production; M. Goillandeau and Andrew Penn for mEPSC analysis software (Detection Mini). This work was supported by funding from the Ministère de l'Enseignement Supérieur et de la Recherche (ANR NanoDom), Centre National de la Recherche Scientifique, FRM to BC, ERC Grant nano-dyn-syn to DC. SyMBaD – ITN Marie Curie, Grant Agreement n° 238608 – 7<sup>th</sup> Framework Program of the EU.

## **AUTHOR CONTRIBUTION**

E.H. conceived the study and formulated the models.

K.T.H. developed the co-localization program.

K.T.H., B.C. and E.H. performed single molecule experiments, analyzed the data and prepared the corresponding figures.

B.C., M.L. and E.H. designed and performed the electrophysiology experiments and corresponding data analysis.

T.B. T.S. developed simulation program and performed simulations.

D.G-B and M.S. developed the NLG peptide

O.T. and DC helped to the conception of experiments.

E.H., O.T. and D.C. wrote the manuscript with help of other authors

## References

- Bartol, T.M., Bromer, C., Kinney, J., Chirillo, M.A., Bourne, J.N., Harris, K.M., and Sejnowski, T.J. (2015a). Nanoconnectomic upper bound on the variability of synaptic plasticity. *eLife* 4, e10778.
- Bartol, T.M., Keller, D.X., Kinney, J.P., Bajaj, C.L., Harris, K.M., Sejnowski, T.J., and Kennedy, M.B. (2015b). Computational reconstitution of spine calcium transients from individual proteins. *Frontiers in synaptic neuroscience* 7, 17.
- Budreck, E.C., Kwon, O.B., Jung, J.H., Baudouin, S., Thommen, A., Kim, H.S., Fukazawa, Y., Harada, H., Tabuchi, K., Shigemoto, R., *et al.* (2013). Neuroligin-1 controls synaptic abundance of NMDA-type glutamate receptors through extracellular coupling. *Proceedings of the National Academy of Sciences of the United States of America* 110, 725-730.
- Chamma, I., Letellier, M., Butler, C., Tessier, B., Lim, K.H., Gauthereau, I., Choquet, D., Sibarita, J.B., Park, S., Sainlos, M., and Thoumine, O. (2016). Mapping the dynamics and nanoscale organization of synaptic adhesion proteins using monomeric streptavidin. *Nature communications* 7, 10773.
- Chih, B., Engelman, H., and Scheiffele, P. (2005). Control of excitatory and inhibitory synapse formation by neuroligins. *Science* 307, 1324-1328.
- Compans, B., Choquet, D., and Hosy, E. (2016). Review on the role of AMPA receptor nano-organization and dynamic in the properties of synaptic transmission. *Neurophotonics* 3, 041811.
- Constals, A., Penn, A.C., Compans, B., Toulme, E., Phillipat, A., Marais, S., Retailleau, N., Hafner, A.S., Coussen, F., Hosy, E., and Choquet, D. (2015). Glutamate-induced AMPA receptor desensitization increases their mobility and modulates short-term plasticity through unbinding from Stargazin. *Neuron* 85, 787-803.
- Dean, C., Scholl, F.G., Choih, J., DeMaria, S., Berger, J., Isacoff, E., and Scheiffele, P. (2003). Neurexin mediates the assembly of presynaptic terminals. *Nature neuroscience* 6, 708-716.
- Franks, K.M., Bartol, T.M., Jr., and Sejnowski, T.J. (2002). A Monte Carlo model reveals independent signaling at central glutamatergic synapses. *Biophysical journal* 83, 2333-2348.
- Franks, K.M., Stevens, C.F., and Sejnowski, T.J. (2003). Independent sources of quantal variability at single glutamatergic synapses. *J Neurosci* 23, 3186-3195.
- Fukata, Y., Dimitrov, A., Boncompain, G., Vielemeyer, O., Perez, F., and Fukata, M. (2013). Local palmitoylation cycles define activity-regulated postsynaptic subdomains. *The Journal of cell biology* 202, 145-161.
- Giannone, G., Hosy, E., Levet, F., Constals, A., Schulze, K., Sobolevsky, A.I., Rosconi, M.P., Gouaux, E., Tampe, R., Choquet, D., and Cognet, L. (2010). Dynamic superresolution imaging of endogenous proteins on living cells at ultra-high density. *Biophysical journal* 99, 1303-1310.
- Giannone, G., Mondin, M., Grillo-Bosch, D., Tessier, B., Saint-Michel, E., Czondor, K., Sainlos, M., Choquet, D., and Thoumine, O. (2013). Neurexin-1beta binding to neuroligin-1 triggers the preferential recruitment of PSD-95 versus gephyrin through tyrosine phosphorylation of neuroligin-1. *Cell reports* 3, 1996-2007.
- Goda, Y., and Stevens, C.F. (1994). Two components of transmitter release at a central synapse. *Proceedings of the National Academy of Sciences of the United States of America* 91, 12942-12946.
- Graf, E.R., Zhang, X., Jin, S.X., Linhoff, M.W., and Craig, A.M. (2004). Neurexins induce differentiation of GABA and glutamate postsynaptic specializations via neuroligins. *Cell* 119, 1013-1026.
- Hafner, A.S., Penn, A.C., Grillo-Bosch, D., Retailleau, N., Poujol, C., Phillipat, A., Coussen, F., Sainlos, M., Opazo, P., and Choquet, D. (2015). Lengthening of the Stargazin Cytoplasmic Tail Increases Synaptic Transmission by Promoting Interaction to Deeper Domains of PSD-95. *Neuron* 86, 475-489.

- Heine, M., Groc, L., Frischknecht, R., Beique, J.C., Lounis, B., Rumbaugh, G., Huganir, R.L., Cognet, L., and Choquet, D. (2008). Surface mobility of postsynaptic AMPARs tunes synaptic transmission. *Science* 320, 201-205.
- Hosy, E., Butler, C., and Sibarita, J.B. (2014). Organization and dynamics of AMPA receptors inside synapses-nano-organization of AMPA receptors and main synaptic scaffolding proteins revealed by super-resolution imaging. *Current opinion in chemical biology* 20, 120-126.
- Irie, M., Hata, Y., Takeuchi, M., Ichtchenko, K., Toyoda, A., Hirao, K., Takai, Y., Rosahl, T.W., and Sudhof, T.C. (1997). Binding of neuroligins to PSD-95. *Science* 277, 1511-1515.
- Jonas, P., Major, G., and Sakmann, B. (1993). Quantal components of unitary EPSCs at the mossy fibre synapse on CA3 pyramidal cells of rat hippocampus. *The Journal of physiology* 472, 615-663.
- Kinney, J.P., Spacek, J., Bartol, T.M., Bajaj, C.L., Harris, K.M., and Sejnowski, T.J. (2013). Extracellular sheets and tunnels modulate glutamate diffusion in hippocampal neuropil. *J Comp Neurol* 521, 448-464.
- Ko, J., Zhang, C., Arac, D., Boucard, A.A., Brunger, A.T., and Sudhof, T.C. (2009). Neuroligin-1 performs neurexin-dependent and neurexin-independent functions in synapse validation. *The EMBO journal* 28, 3244-3255.
- Levet, F., Hosy, E., Kechkar, A., Butler, C., Beghin, A., Choquet, D., and Sibarita, J.B. (2015). SR-Tesseler: a method to segment and quantify localization-based super-resolution microscopy data. *Nature methods* 12, 1065-1071.
- Levinson, J.N., Chery, N., Huang, K., Wong, T.P., Gerrow, K., Kang, R., Prange, O., Wang, Y.T., and El-Husseini, A. (2005). Neuroligins mediate excitatory and inhibitory synapse formation: involvement of PSD-95 and neurexin-1beta in neuroligin-induced synaptic specificity. *The Journal of biological chemistry* 280, 17312-17319.
- Lisman, J.E., Raghavachari, S., and Tsien, R.W. (2007). The sequence of events that underlie quantal transmission at central glutamatergic synapses. *Nature reviews* 8, 597-609.
- Liu, G., Choi, S., and Tsien, R.W. (1999). Variability of neurotransmitter concentration and nonsaturation of postsynaptic AMPA receptors at synapses in hippocampal cultures and slices. *Neuron* 22, 395-409.
- MacGillavry, H.D., Song, Y., Raghavachari, S., and Blanpied, T.A. (2013). Nanoscale scaffolding domains within the postsynaptic density concentrate synaptic AMPA receptors. *Neuron* 78, 615-622.
- Manders, E., Verbeek, F.J. and Aten JA. (1993). Measurement of co-localization of objects in dual-colour confocal images. *J Microscopy* 169, 375-382.
- Masugi-Tokita, M., Tarusawa, E., Watanabe, M., Molnar, E., Fujimoto, K., and Shigemoto, R. (2007). Number and density of AMPA receptors in individual synapses in the rat cerebellum as revealed by SDS-digested freeze-fracture replica labeling. *J Neurosci* 27, 2135-2144.
- Missler, M., Zhang, W., Rohlmann, A., Kattenstroth, G., Hammer, R.E., Gottmann, K., and Sudhof, T.C. (2003). Alpha-neurexins couple Ca<sup>2+</sup> channels to synaptic vesicle exocytosis. *Nature* 423, 939-948.
- Mondin, M., Labrousse, V., Hosy, E., Heine, M., Tessier, B., Levet, F., Poujol, C., Blanchet, C., Choquet, D., and Thoumine, O. (2011). Neurexin-neuroligin adhesions capture surface-diffusing AMPA receptors through PSD-95 scaffolds. *J Neurosci* 31, 13500-13515.
- Nair, D., Hosy, E., Petersen, J.D., Constals, A., Giannone, G., Choquet, D., and Sibarita, J.B. (2013). Super-resolution imaging reveals that AMPA receptors inside synapses are dynamically organized in nanodomains regulated by PSD95. *J Neurosci* 33, 13204-13224.
- Nam, C.I., and Chen, L. (2005). Postsynaptic assembly induced by neurexin-neuroligin interaction and neurotransmitter. *Proceedings of the National Academy of Sciences of the United States of America* 102, 6137-6142.
- Raghavachari, S., and Lisman, J.E. (2004). Properties of quantal transmission at CA1 synapses. *Journal of neurophysiology* 92, 2456-2467.



- Ribrault, C., Reingruber, J., Petkovic, M., Galli, T., Ziv, N.E., Holcman, D., and Triller, A. (2011). Syntaxin1A lateral diffusion reveals transient and local SNARE interactions. *J Neurosci* 31, 17590-17602.
- Sainlos, M., Tigaret, C., Poujol, C., Olivier, N.B., Bard, L., Breillat, C., Thiolon, K., Choquet, D., and Imperiali, B. (2011). Biomimetic divalent ligands for the acute disruption of synaptic AMPAR stabilization. *Nature chemical biology* 7, 81-91.
- Sara, Y., Biederer, T., Atasoy, D., Chubykin, A., Mozhayeva, M.G., Sudhof, T.C., and Kavalali, E.T. (2005). Selective capability of SynCAM and neuroligin for functional synapse assembly. *J Neurosci* 25, 260-270.
- Savtchenko, L.P., Sylantsev, S., and Rusakov, D.A. (2013). Central synapses release a resource-efficient amount of glutamate. *Nature neuroscience* 16, 10-12.
- Scheiffele, P., Fan, J., Choih, J., Fetter, R., and Serafini, T. (2000). Neuroligin expressed in nonneuronal cells triggers presynaptic development in contacting axons. *Cell* 101, 657-669.
- Schneider, R., Hosy, E., Kohl, J., Klueva, J., Choquet, D., Thomas, U., Voigt, A., and Heine, M. (2015). Mobility of calcium channels in the presynaptic membrane. *Neuron* 86, 672-679.
- Shipman, S.L., Schnell, E., Hirai, T., Chen, B.S., Roche, K.W., and Nicoll, R.A. (2011). Functional dependence of neuroligin on a new non-PDZ intracellular domain. *Nature neuroscience* 14, 718-726.
- Sudhof, T.C. (2008). Neuroligins and neurexins link synaptic function to cognitive disease. *Nature* 455, 903-911.
- Tang, A.H., Chen, H., Li, T.P., Metzbower, S.R., MacGillavry, H.D., and Blanpied, T.A. (2016). A trans-synaptic nanocolumn aligns neurotransmitter release to receptors. *Nature* 536, 210-214.
- Tarusawa, E., Matsui, K., Budisantoso, T., Molnar, E., Watanabe, M., Matsui, M., Fukazawa, Y., and Shigemoto, R. (2009). Input-specific intrasynaptic arrangements of ionotropic glutamate receptors and their impact on postsynaptic responses. *J Neurosci* 29, 12896-12908.
- Tomita, S., Shenoy, A., Fukata, Y., Nicoll, R.A., and Brecht, D.S. (2007). Stargazin interacts functionally with the AMPA receptor glutamate-binding module. *Neuropharmacology* 52, 87-91.

## Figures legends

**Figure 1. Expression of WT neuroligin but not NLG1- $\Delta$ Cter affects AMPAR synaptic nano-organization.** **(A)** Example of neurons transfected either with GFP, NLG1 + GFP or NLG1- $\Delta$ Cter + GFP (from the left to the right), and two examples of AMPAR organization visualized with d-STORM technique. Intensity is color coded, scale go from 1 (purple) to 100 (white) detection per pixel. Average of spine density **(B)**, AMPAR nanodomain density **(C)**, nanodomains intensity expressed as number of receptors per nanodomain **(D)** and nanodomain length **(E)**, on neuron expressing GFP, GFP + NLG1 and NLG1- $\Delta$ Cter + GFP (n=10; 9; 12 cells respectively; and between 200 to 500 individual domains).

**Figure 2. Delta C neuroligin does not co-localize with AMPAR nanoclusters.** **(A)** Example of dual-color d-STORM super-resolution image of GluA2 containing AMPAR labelled with Alexa 532 nm and HA-tagged NLG1 labelled with Alexa 647 nm. **(B)** Examples of GluA2 and NLG1 (left) or GluA2 and NLG1- $\Delta$ Cter (right) co-labeling of two synapses. Dark spots on the overlay image represent co-localizing pixels; NLG1 (in green) strongly co-localizes with AMPAR nanodomains (in purple). NLG1- $\Delta$ Cter (in green) does not co-localize with AMPAR nanodomains (in purple). **(C)**, **(D)** and **(E)** presents the quantification of this co-localization. **(C)** The size distribution of NLG1 (green), NLG1- $\Delta$ Cter (red) and GluA2 (black) super-resolved objects. The expression of NLG1- $\Delta$ Cter does not affect the size of neuroligin 1 and GluA2 nanodomain objects. **(D)** Cumulative distribution of the measured (red) and randomized (dark) bivariate nearest neighbor distance between large object of GluA2 and NLG1- $\Delta$ Cter. Green line represents the nearest neighbor distance between large object of GluA2 and neuroligin 1, demonstrating clustering as compared to random distribution. Insert represents a zoom on the 250 nm, approximate size of a PSD; NLG1- $\Delta$ Cter and GluA2 nanodomain distance overlaps with the random distribution distance. **(E)** Manders' coefficients calculated between GluA2 nanodomains and NLG1- $\Delta$ Cter (red) and between GluA2 nanodomains and NLG1 (green). More than 60% of AMPAR nanodomains are not co-localized with NLG1- $\Delta$ Cter (n= 18 and 12 NLG1 and NLG1- $\Delta$ Cter cells respectively, corresponding to 516 and 312 independent pairs of co-localization).

**Figure 3. Delta C neuroligin expression decorrelates pre-synaptic RIM from AMPAR nanoclusters.** **(A)** Example of dual-color d-STORM super-resolution image of GluA2 containing AMPAR labelled with Alexa 532 nm and RIM labelled with Alexa 647 nm. Right panels, examples of GluA2 and RIM co-labeling when post-synaptic neurons are transfected with GFP, NLG1 or NLG1- $\Delta$ Cter respectively (from the left to the right). **(B)** and **(C)** presents the quantification of this co-localization. **(B)** Cumulative distribution of the bivariate nearest neighbor distance between GluA2 and RIM clusters when post-synaptic neuron expressed GFP (dark), NLG1 (green) or NLG1- $\Delta$ Cter (red). These data demonstrate a loss of the pre-post synaptic alignment when NLG1- $\Delta$ Cter is expressed. **(C)** Manders' coefficients calculated between GluA2 nanodomains and RIM clusters in function of the neuroligin wt or truncated form expression. NLG1- $\Delta$ Cter expression significantly alters the co-localization (n= 9; 9 and 8 Control, NLG1- $\Delta$ Cter and NLG1 cells respectively, corresponding to 354; 573 and 562 independent pairs of co-localization).

**Figure 4. NLG1- $\Delta$ Cter expression strongly impaired synaptic transmission efficacy.** **(A)** Example of mEPSC traces recorded in cultured neurons expressing either GFP, GFP + NLG1-

$\Delta$ Cter or GFP + NLG1. **(B)** Cumulative distribution and **(C)** average of the mEPSC amplitude recorded on neurons expressing GFP (dark), GFP + NLG1- $\Delta$ Cter (red) or GFP + NLG1 (green) (n=14; 14 and 13 respectively). mEPSCs amplitude is decreased by 25 % in neurons expressing NLG1- $\Delta$ Cter. **(D)** Scheme of the patch clamp protocol used to record asynchronous EPSC on organotypic hippocampus slices. Two neighboring neurons are simultaneously patched, one transfected and one non transfected, Schaffer collateral connecting both neuron are then stimulated. **(E and F)** Representative traces of asynchronous EPSCs recorded in the presence of strontium, of either a control and a NLG1- $\Delta$ Cter expressing neuron **(E)** or a control and a NLG1 **(F)**. To avoid multi synaptic responses, 50 ms following the stimulation are excluded from the analysis. **(G)** Cumulative distribution of aEPSCs amplitude recorded from control (dark), or neurons expressing GFP + NLG1- $\Delta$ Cter (red) or GFP + NLG1 (green) (n=8 and 6 paired of cells, respectively). Average of aEPSCs amplitude, with connection between the transfected cell and their respective neighboring non transfected control, when either GFP + NLG1 **(H)** or GFP + NLG1- $\Delta$ Cter **(I)** are expressed. NLG1- $\Delta$ Cter expression decreased by 25 % the average aEPSCs amplitude.

**Figure 5. Acute disruption of PSD95-NLG interaction impaired both pre-post alignment and synaptic transmission.** **(A)** Example of dual-color d-STORM image of GluA2 containing AMPAR labelled with Alexa 532 nm and RIM labelled with Alexa 647 nm. Right panels, examples of GluA2 and RIM co-labeling without ligand or after 1 days treatment with NLG biomimetic ligand or non-sense ligand (from the left to the right). **(B) and (C)** presents the quantification of this co-localization. **(B)** Cumulative distribution of the bivariate nearest neighbor distance between GluA2 and RIM clusters without ligand (dark), with NLG ligand NLG1 (green) or non-sense ligand (blue). These data demonstrate a loss of the pre-post synaptic alignment in the presence of NLG ligand. **(C)** Manders' coefficients calculated between GluA2 nanodomains and RIM clusters in function of ligand treatment (n= 4; 5 and 4 Control, NLG ligand and non-sense ligand respectively, corresponding to 451; 1311 and 640 independent pairs of co-localization). **(D)** Example of mEPSC traces recorded in cultured neurons without ligand, with NLG ligand or with non-sense ligand. **(E) and (F)** average of the mEPSC amplitude and amplitude recorded when neurons in culture are incubated without ligand (dark) or with either NLG ligand (red) or with non-sense ligand (blue) (n=9; 15 and 13 respectively). mEPSCs amplitude is decreased by 30 % in neurons incubated with NLG ligand.

**Figure 6. Simulation of AMPAR activation.** **(A)** View of dendritic spine with synaptic contact area (red patch) containing 25 AMPARs anchored in nanocluster (blue particles) and 70 freely diffusible AMPAR (red particles). The simulated glutamate release locations are shown by white dots spaced 50 nm apart. **(B)** Kinetic scheme for activation of AMPAR by glutamate (Jonas et al. 1993). Kinetic rate constants values (after fitting as described in Methods):  $k_1 = 9.18 \mu\text{M}^{-1}\text{s}^{-1}$ ;  $k_{1r} = 4260 \text{ s}^{-1}$ ;  $k_2 = 56.8 \mu\text{M}^{-1}\text{s}^{-1}$ ;  $k_{2r} = 3260 \text{ s}^{-1}$ ;  $\alpha = 2650 \text{ s}^{-1}$ ;  $\beta = 200 \text{ s}^{-1}$ ;  $\alpha_1 = 2890 \text{ s}^{-1}$ ;  $\beta_1 = 20 \text{ s}^{-1}$ ;  $\alpha_2 = 120 \text{ s}^{-1}$ ;  $\beta_2 = 0.727 \text{ s}^{-1}$ ;  $\alpha_3 = 200 \text{ s}^{-1}$ ;  $\beta_3 = 4 \text{ s}^{-1}$ ;  $\alpha_4 = 16.8 \text{ s}^{-1}$ ;  $\beta_4 = 190.4 \text{ s}^{-1}$ ;  $k_3 = 1.27 \mu\text{M}^{-1}\text{s}^{-1}$ ;  $k_{3r} = 45.7 \text{ s}^{-1}$ ; AMPAR diffusion constant =  $0.1 \mu\text{m}^2\text{s}^{-1}$ ; and glutamate diffusion constant =  $100 \mu\text{m}^2\text{s}^{-1}$ . **(C)** Time course of simulated AMPAR activation resulting from release of 1500, 3000, and 4500 glutamate molecules at each release location are shown. Each time course is the average of 100 simulations. **(D)** Normalized peak number of open

AMPARs activated by release of 1500, 2000, 3000, and 4500 glutamate molecules at each release location is shown. Dashed line at 90 nm indicates data displayed in E. **(E)** Percent decrease in peak number of open AMPAR as a function of number of glutamate molecules released, at 90 nm release distance. Dashed lines indicate that when ~2000 glutamate molecules are released the peak number of open AMPARs will be decreased by 25% at a release distance of 90 nm.

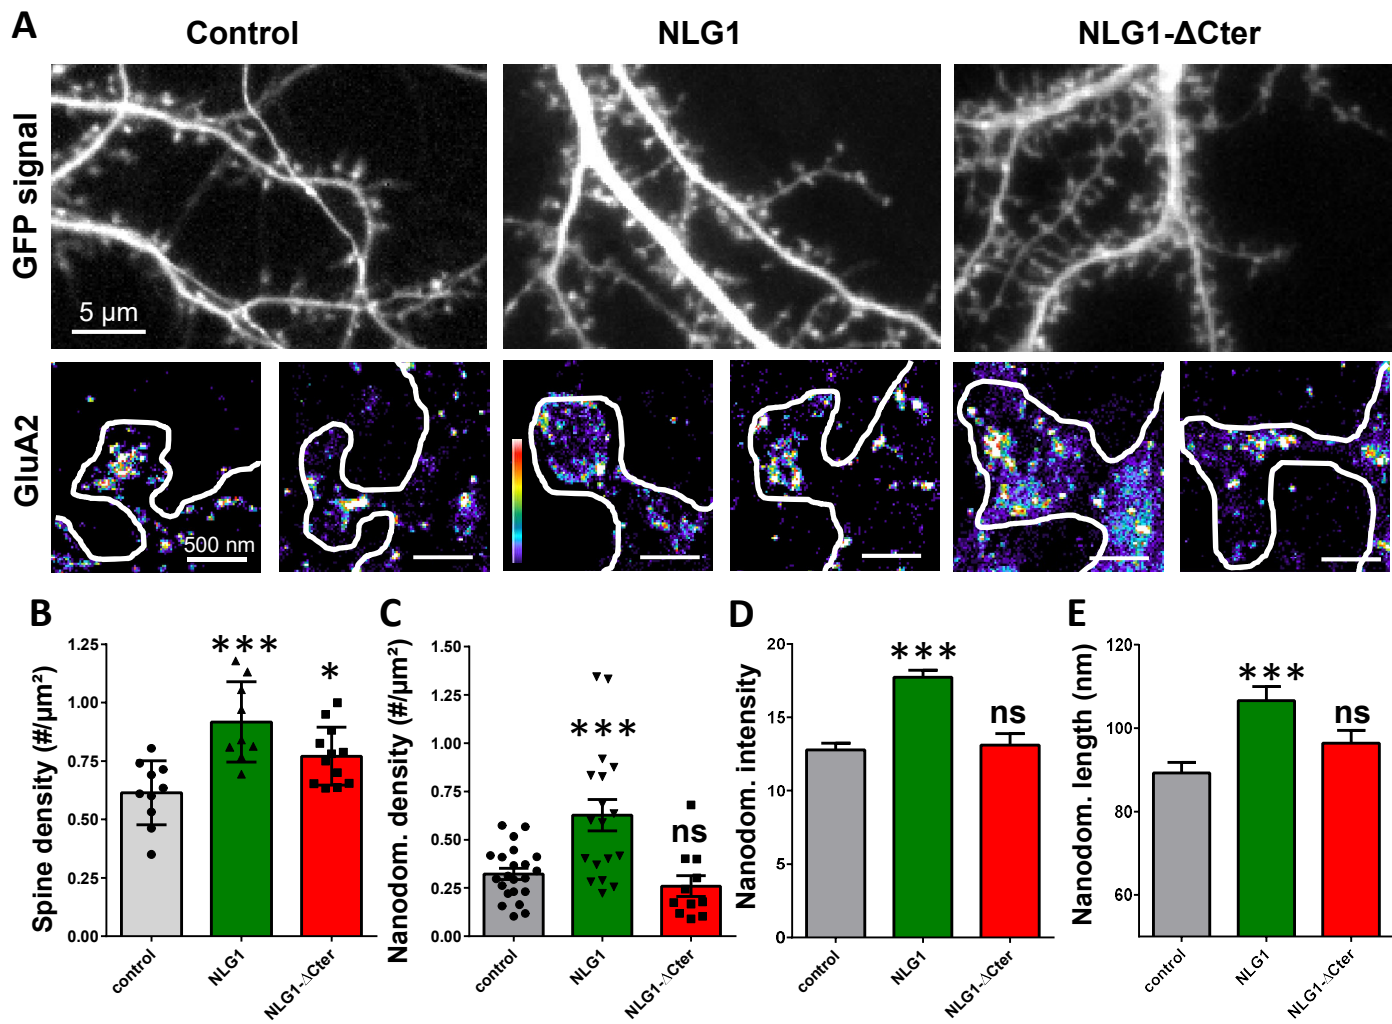

Figure 1

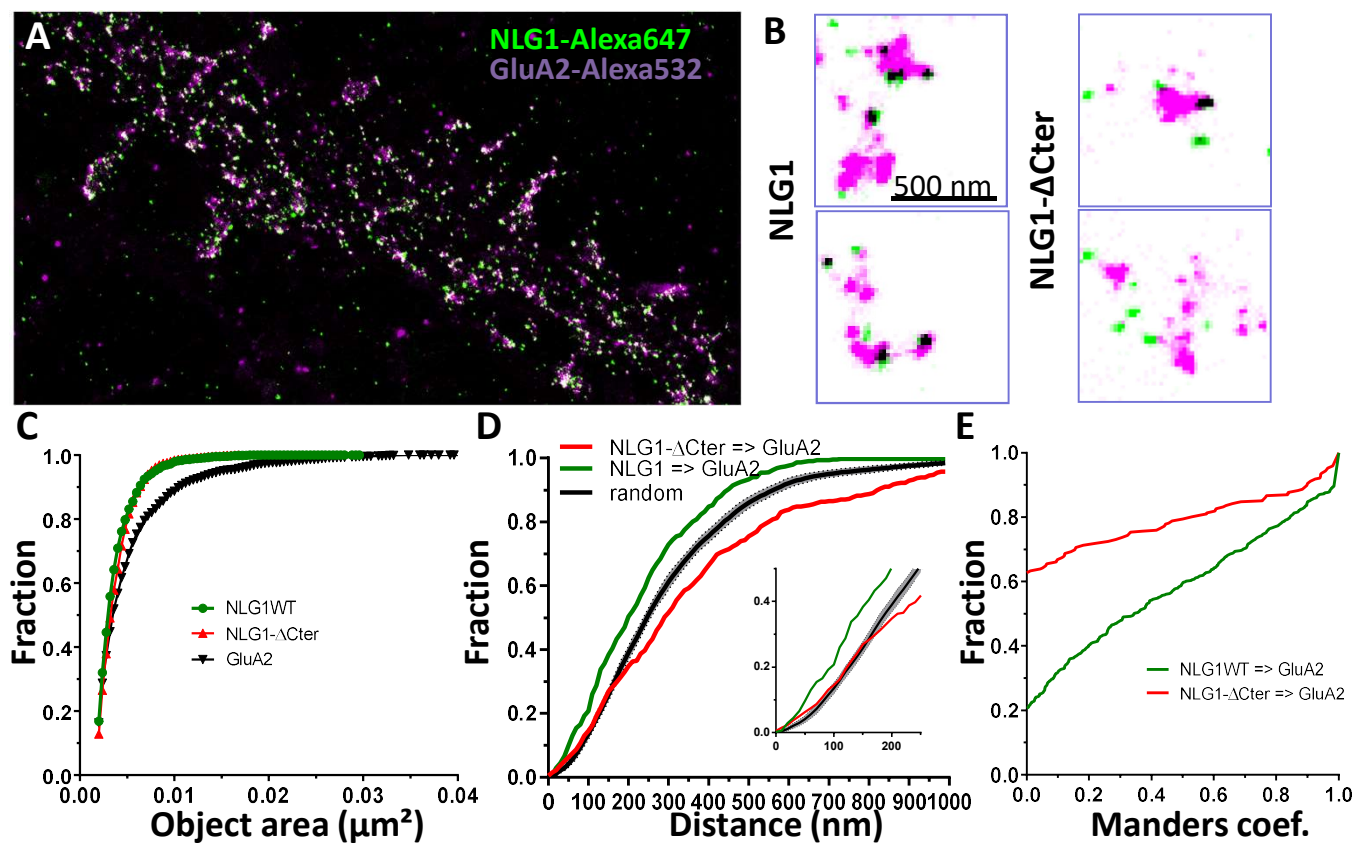

Figure 2

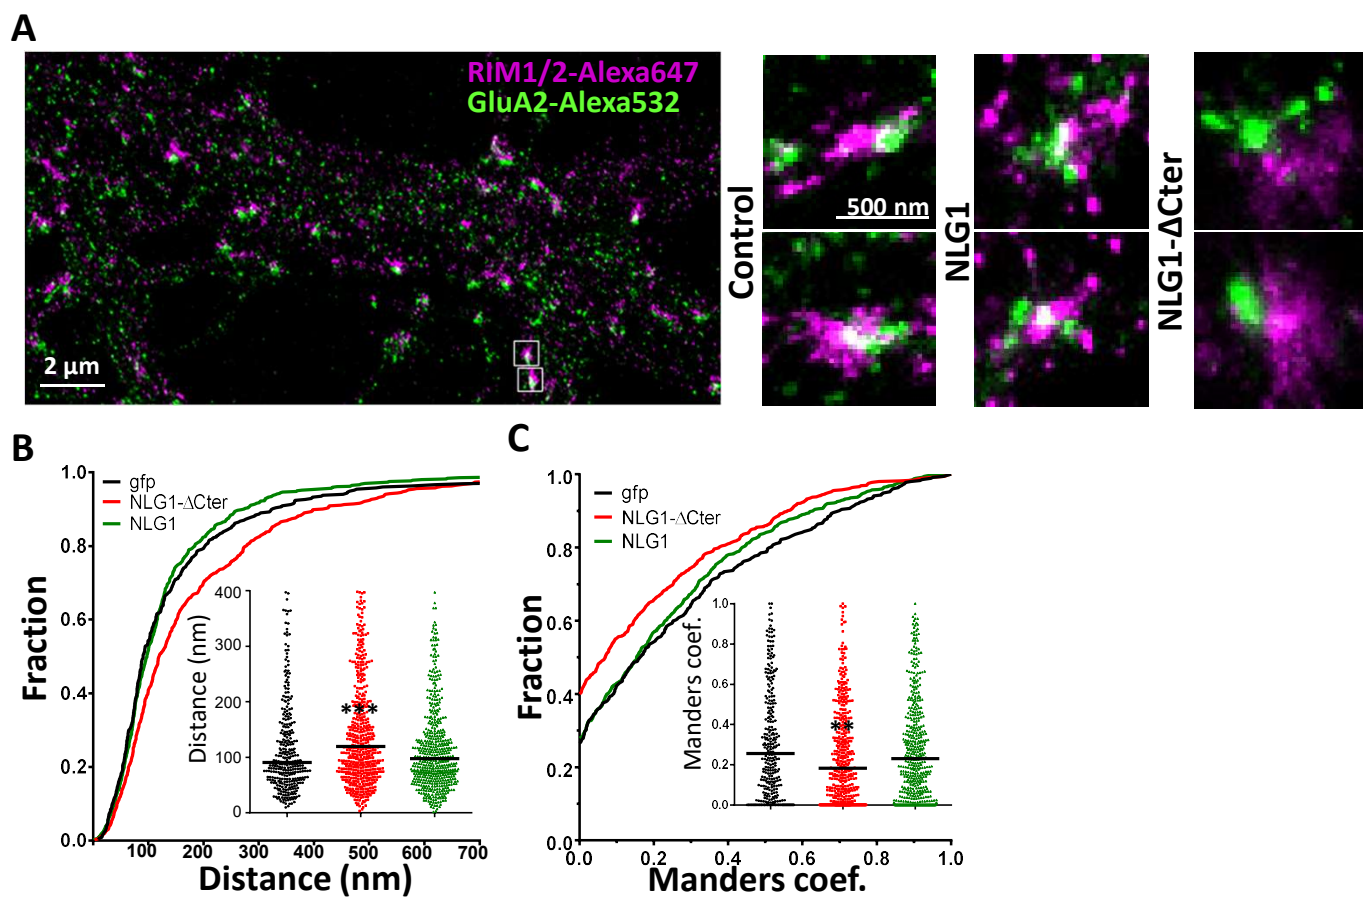

Figure 3

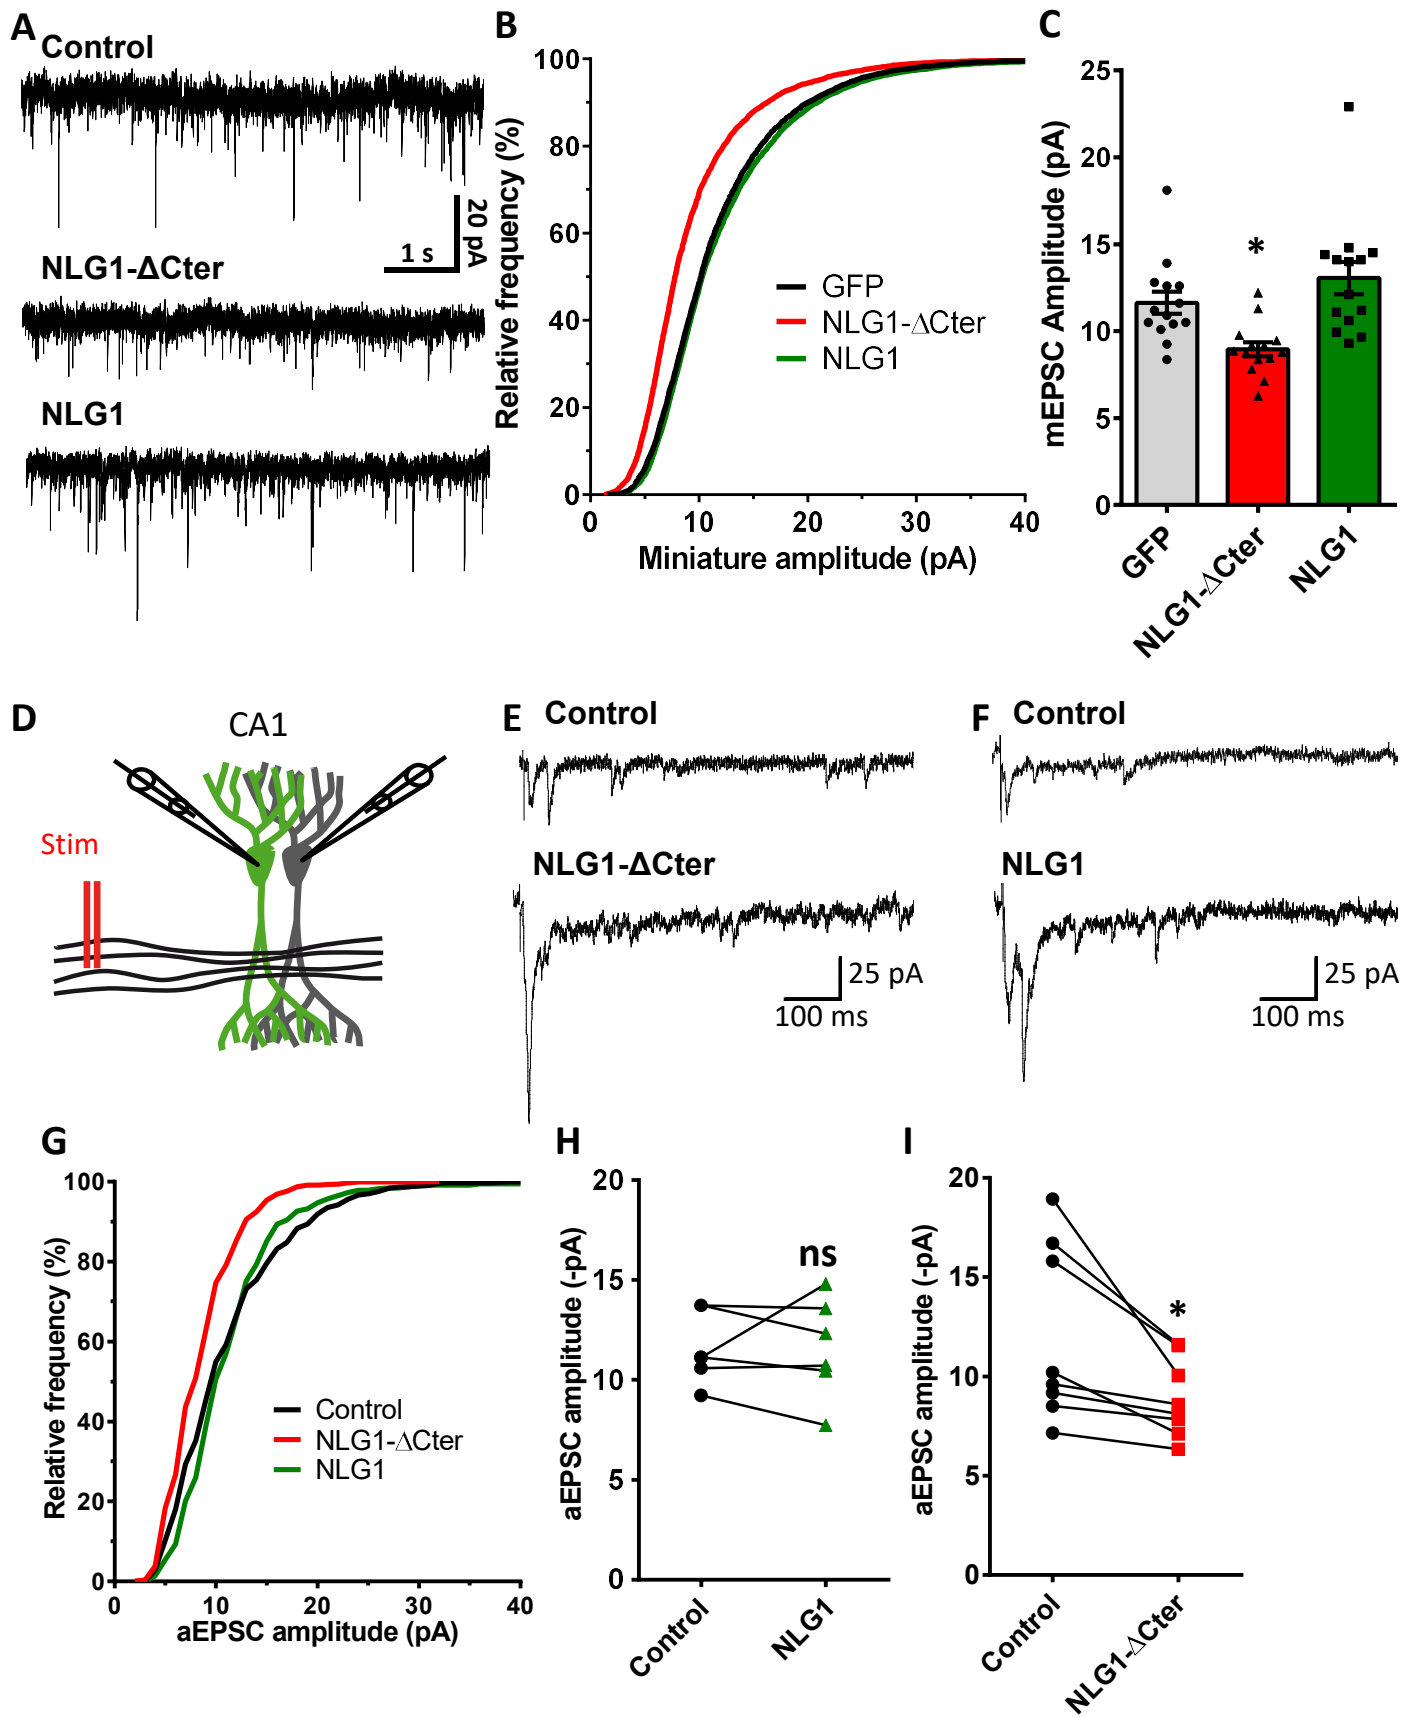

Figure 4



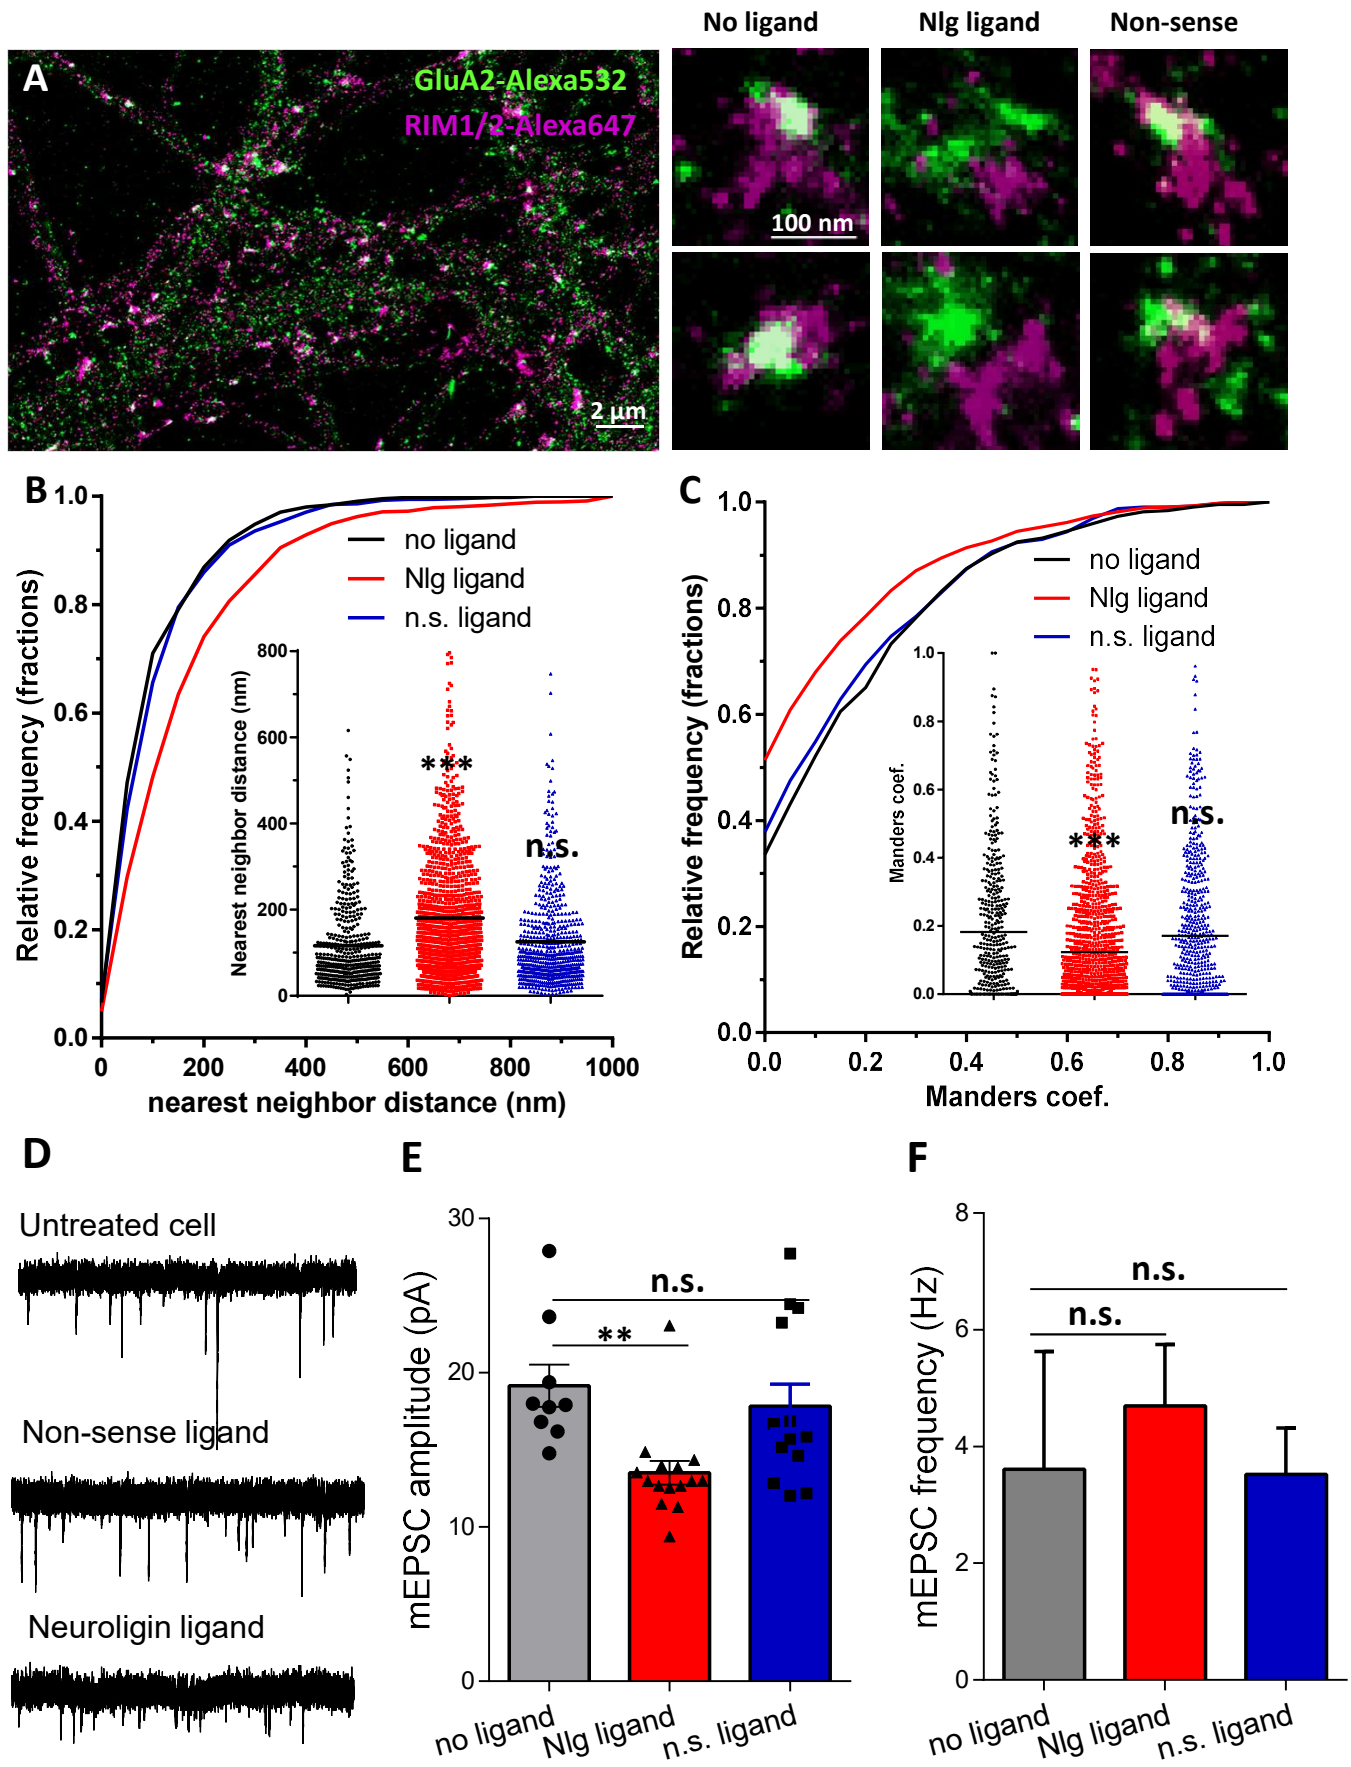

Figure 5

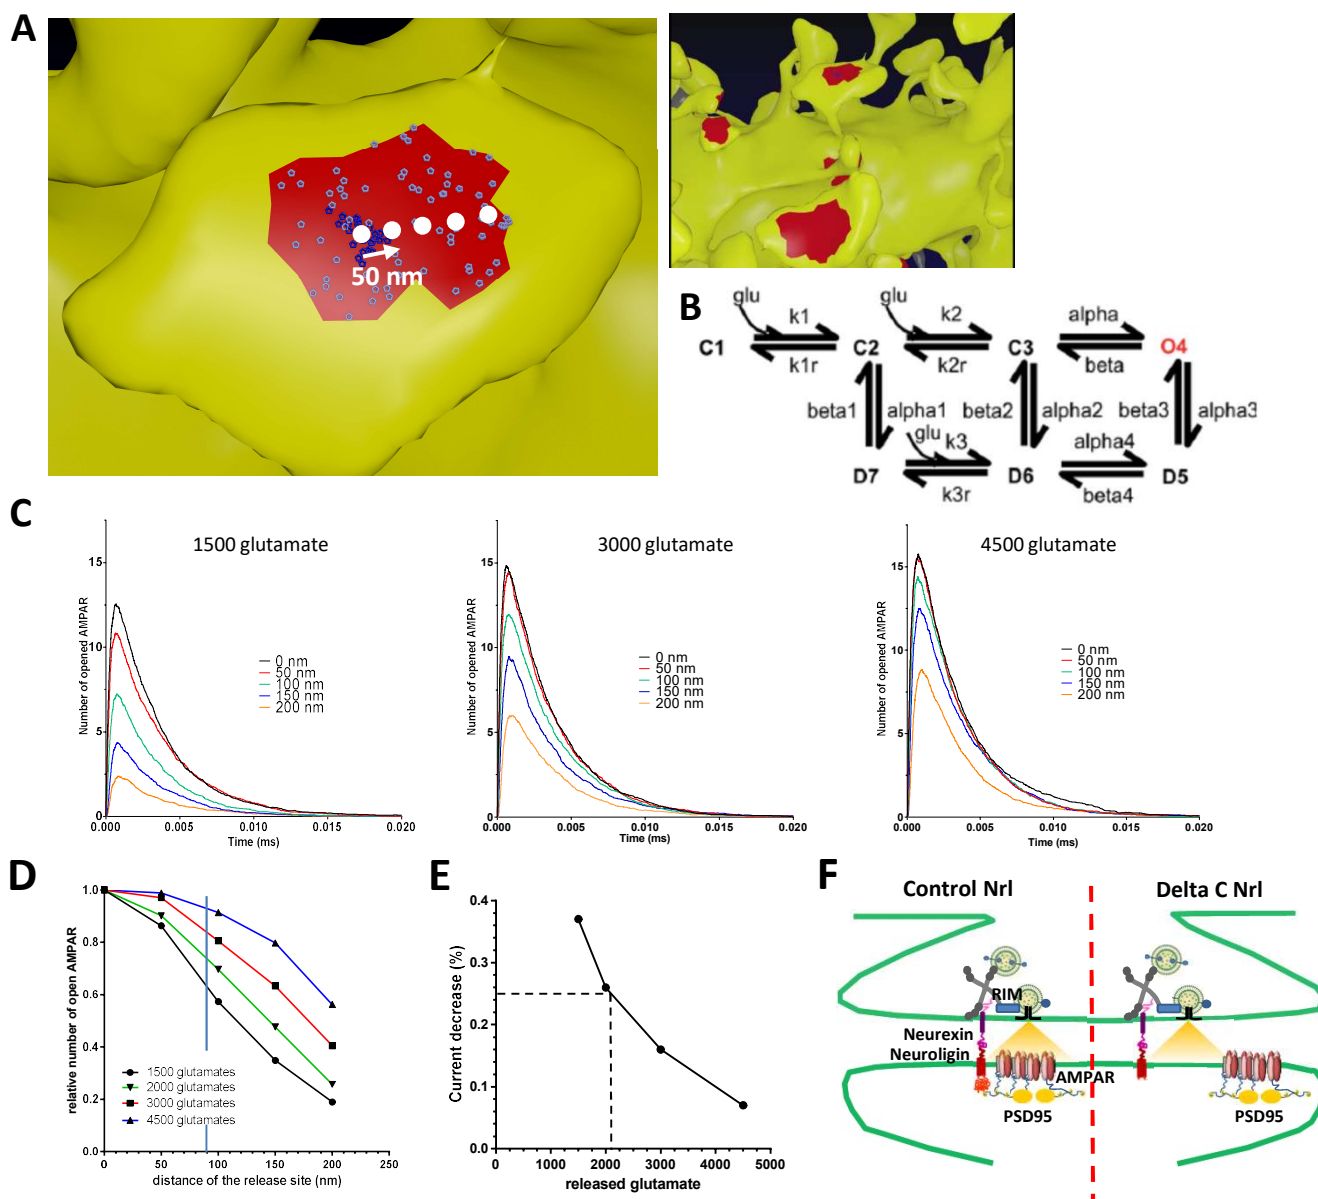

Figure 6
